# Supplementary material for: Implementasi azas-azas Asuransi pada Polis Asuransi kerugian di Indonesia
Source: MDPI journal article supplement (doi:10.3390/plants10050866), 2004-01-01
Supplement: s1 [file s1]

**Table S1.** Primers of *BnaBOR1;2* and *BnaNIP5;1* designed for real-time PCR.

| Genes            | Primers                          | Genbank accession number |
|------------------|----------------------------------|--------------------------|
| <i>BnaBOR1;2</i> | F-5'- CCGTTGTACAGGAGATGCTTG -3'  | GU827643                 |
|                  | R-5'- AACCCAAGAAGAAGCAAGTCG -3'  |                          |
| <i>BnaNIP5;1</i> | F-5'- GGGGCTCACTTAAATCCATCAC -3' | KT899999                 |
|                  | R-5'- CCAACACTAACAGACGGAACAG -3' |                          |
| <i>BnaActin</i>  | F-5'- TCTGGTGATGGTGTGTCTCA -3'   | AF111812                 |
|                  | R-5'- GGTCAACATGTACCCTCTCTCG -3' |                          |

Primer design was done by using Primer3plus and primer-blast online software.
